# Supplementary material for: Effects of porous hedgehog-like morphology and graphene oxide on the cycling stability and rate performance of Co3O4/NiO microspheres
Source: Royal Society of Chemistry journal article supplement (doi:10.1039/d4nh00504j), 2025-01-01
Supplement: d4nh00504j1.pdf [file d4nh00504j1.pdf]

## Supporting Information

### Effects of Porous Hedgehog-Like Morphology and Graphene Oxide on Cycling Stability and Rate performance of $\text{Co}_3\text{O}_4/\text{NiO}$ Microspheres

Guozhen Zhu,<sup>†\*</sup> Xinsong Xu,<sup>†b</sup> Yiyao Zhang,<sup>a</sup> Jiale Lian,<sup>a</sup> Yuhan Li,<sup>a</sup> Zhen Yang,<sup>\*a</sup> Renchao Che<sup>\*b</sup>

†These authors contributed equally.

a.School of Chemical Engineering, Jiangxi Normal University, Nanchang 330022, P. R. China

b.Laboratory of Advanced Materials, Shanghai Key Lab of Molecular Catalysis and Innovative Materials, Academy for Engineering & Technology, Advanced Coatings Research Center of Ministry of Education of China, Fudan University, Shanghai 200438, P. R. China

Fig. S1 SEM images of PHCNO/GO microspheres

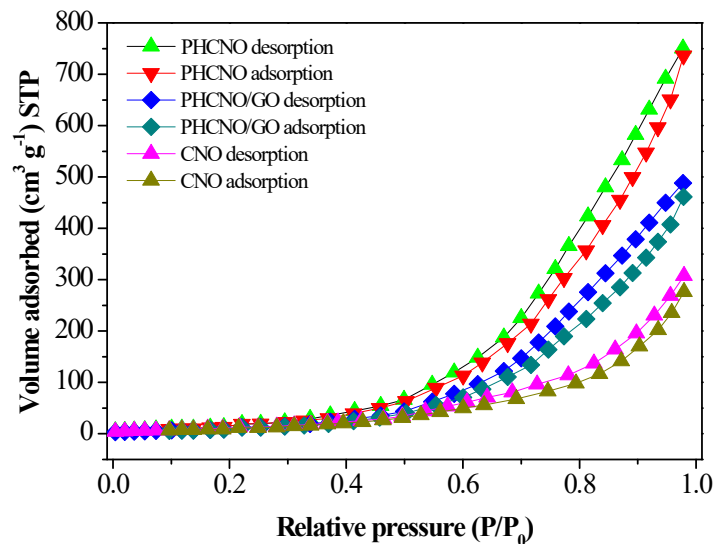

Fig. S2 N<sub>2</sub> adsorption/desorption profiles of PHCNO microspheres, PHCNO/GO microspheres and CNO nanospheres

Fig. S3 SEM images of PHCNO/GO microspheres after 1000 cycles at 3000 mA g<sup>-1</sup>

Fig. S4 Charge and discharge profiles of (a) PHCNO/GO microspheres, (b) PHCNO microspheres and (c) CNO nanospheres

Fig. S5 TEM image of PHCNO/GO microspheres after 3 cycles cyclic voltammetry profiles

Fig. S6  $\sigma$  values of PHCNO/GO microspheres, PHCNO microspheres and CNO nanospheres

Fig. S7 Log(i) vs. log(v) plots for (a) oxidation, and (b) reduction peaks and slopes of the fitted lines of PHCNO/GO microspheres

Table S1 Rate capability comparison of the reported cobalt/nickel oxide and PHCNO/GO microspheres

| Materials                                                        | Specific capacity<br>(mA h g <sup>-1</sup> ) | Current density<br>(mA g <sup>-1</sup> ) | Reference        |
|------------------------------------------------------------------|----------------------------------------------|------------------------------------------|------------------|
| Co <sub>3</sub> O <sub>4</sub> /NiO/NC                           | 493                                          | 5000                                     | 35               |
| CoO@N-C nanocubes                                                | 309                                          | 1000                                     | 36               |
| Carbon-nickel composite<br>nanowires                             | 420                                          | 200                                      | 37               |
| PDA@NiO@Graphite                                                 | 402                                          | 500                                      | 38               |
| cPAN/Co <sub>3</sub> O <sub>4</sub> composite<br>nanofiber       | 396.5                                        | 1000                                     | 39               |
| CoO/NiO/CoNi                                                     | 267                                          | 2000                                     | 40               |
| Ni <sub>2</sub> Co <sub>2</sub> O <sub>4</sub> /activated carbon | 621                                          | 2000                                     | 41               |
| CNO nanospheres                                                  | 244.6                                        | 5000                                     | This work        |
| PHCNO microspheres                                               | 348.3                                        | 5000                                     | This work        |
| <b>PHCNO/GO microspheres</b>                                     | <b>526.7</b>                                 | <b>5000</b>                              | <b>This work</b> |

Table S2. The resistance values of PHCNO microspheres, PHCNO/GO microspheres, and CNO nanospheres after fitting of EIS data

| Materials | R <sub>s</sub><br>(ohm/cm <sup>2</sup> ) | Q <sub>1</sub><br>(μF/cm <sup>2</sup> ) | R <sub>ct</sub><br>(ohm/cm <sup>2</sup> ) | Q <sub>2</sub> (μF/cm <sup>2</sup> ) |
|-----------|------------------------------------------|-----------------------------------------|-------------------------------------------|--------------------------------------|
|-----------|------------------------------------------|-----------------------------------------|-------------------------------------------|--------------------------------------|

---

|                          |      |      |        |         |
|--------------------------|------|------|--------|---------|
| PHCNO/GO<br>microspheres | 1.29 | 1.87 | 86.68  | 2741.85 |
| PHCNO<br>microspheres    | 1.15 | 1.52 | 115.26 | 5929.17 |
| CNO nanospheres          | 1.23 | 1.75 | 186.34 | 2924.95 |

---
